# Supplementary material for: Quality Evaluation of Fair-Trade Cocoa Beans from Different Origins Using Portable Near-Infrared Spectroscopy (NIRS)
Source: MDPI journal article supplement (doi:10.3390/foods12010004), 2022-12-20
Supplement: s1 [file s1]

Table S1. Cocoa origin of different commercial lot analysed in this study.

| <b>SAMPLE</b> | <b>Commercial label</b> | <b>Origin</b>      |
|---------------|-------------------------|--------------------|
| 1             | TCLU 6447817            | Togo               |
| 2             | TCKU 6003395            | Ecuador            |
| 3             | GCNU 4779442            | Togo               |
| 4             | GCNU 4791601            | Togo               |
| 5             | GCNU 4791582            | Togo               |
| 6             | CAIU 7176858            | Togo               |
| 7             | TCKU 7334740            | Perù               |
| 8             | MSCU 5732757            | Togo               |
| 9             | MSCU 5004140            | Togo               |
| 10            | GCNU 4780504            | Togo               |
| 11            | ACLU 9786610            | Togo               |
| 12            | GCNU 4732086            | Togo               |
| 13            | GCNU 4779442            | Togo               |
| 14            | DFSU 6281608            | Togo               |
| 15            | MSCU 5563050            | Togo               |
| 16            | MSCU 7865379            | Togo               |
| 17            | TGBU 5781302            | Togo               |
| 18            | FFAU 1707460            | Togo               |
| 19            | MEDU 4134886            | Togo               |
| 20            | TCKU 6876563            | Nicaragua          |
| 21            | 20/045                  | Togo               |
| 22            | 20/030                  | Sierra Leone       |
| 23            | 90/20                   | Ecuador            |
| 24            | 20515-3                 | Africa             |
| 25            | 60111                   | Dominican Republic |
| 26            | 20/01-A                 | Perù               |
| 27            | 97676A                  | Venezuela          |
| 28            | 2368/2021               | Uganda             |
| 29            | 94060V                  | Africa "Maina"     |
| 30            | 200530-000              | Uganda             |
| 31            | 97318                   | Dominican Republic |
| 32            | 1141963                 | Madagascar         |
| 33            | 1181672                 | Honduras           |
| 34            | C2019-01/VC01946        | Perù               |
| 35            | FBLU 0076159            | Uganda             |
| 36            | 2378/2021               | Perù               |
| 37            | 910597                  | Africa             |
| 38            | 115.2167A               | Ecuador            |
| 39            | 2362/2021               | Africa             |
| 40            | AGS-345                 | Venezuela          |
| 41            | PTC 200023-02           | Sierra Leone       |
| 42            | HLXU 8490101            | Ecuador            |

|    |              |           |
|----|--------------|-----------|
| 43 | 22           | Ecuador   |
| 44 | TCLU 4723773 | Togo      |
| 45 | 99/20        | Ecuador   |
| 46 | 20515-1      | Africa    |
| 47 | VCU 1815 A   | Perù      |
| 48 | AGS-351      | Venezuela |
| 49 | DN-19003870  | Africa    |
| 50 | BEAU 4992555 | Perù      |
| 51 | TRHU 4573123 | Perù      |
| 52 | 3210601418   | Ecuador   |
| 53 | 175          | Ecuador   |
| 54 | CAIU71766858 | Togo      |
| 55 | HASU5184268  | Perù      |
| 56 | 2551/2021    | Africa    |

---

Table S2. Fitting statistics of prediction models for ground cocoa traits developed using full spectra and principal component regression (PCR) and cross-validation results for benchtop (NIR FOSS DS 2500).

| Math Treatment |      | Constituent | N  | Mean  | SD   | SEcal | R <sup>2</sup> cal | SEcv | R <sup>2</sup> cv | RPD  |
|----------------|------|-------------|----|-------|------|-------|--------------------|------|-------------------|------|
| NONE           | 0011 | Fat         | 56 | 2.45  | 0.27 | 0.15  | 0.72               | 0.15 | 0.70              | 1.83 |
| NONE           | 0011 | Protein     | 54 | 0.77  | 0.10 | 0.04  | 0.81               | 0.05 | 0.77              | 2.09 |
| SNV_DET        | 1441 | TPC         | 53 | 2.99  | 0.62 | 0.51  | 0.32               | 0.52 | 0.31              | 1.19 |
| SNV_DET        | 1441 | pH          | 55 | 5.57  | 0.36 | 0.27  | 0.45               | 0.28 | 0.43              | 1.32 |
| SNV_DET        | 1441 | TA          | 55 | 17.24 | 4.23 | 3.31  | 0.39               | 3.34 | 0.38              | 1.27 |
| SNV_DET        | 1441 | FI          | 56 | 1.29  | 0.49 | 0.47  | 0.09               | 0.46 | 0.16              | 1.09 |
| NONE           | 0011 | DM          | 56 | 94.51 | 0.59 | 0.25  | 0.82               | 0.26 | 0.81              | 2.28 |
| NONE           | 0011 | Ash         | 56 | 0.16  | 0.03 | 0.02  | 0.68               | 0.02 | 0.66              | 1.67 |

NONE = no correction; SNV\_DET = SNV and detrend; SD = standard deviation of reference data selected; SEcal = standard error in calibration; R<sup>2</sup>cal = coefficient of determination of calibration; SEcv = standard error in cross-validation; R<sup>2</sup>cv = coefficient of determination of cross-validation. TPC = total phenolic compound; TA = tirtatable acidity; FI = fermentation index; DM = dry matter.

Table S3. Fitting statistics of prediction models for ground cocoa traits developed using selected wavelengths through the interval PLS (iPLS) and cross-validation results for benchtop (NIR FOSS DS 2500).

| Math Treatment |      | Constituent | N  | Mean  | SD   | SEcal | R <sup>2</sup> cal | SEcv | R <sup>2</sup> cv | RPD  |
|----------------|------|-------------|----|-------|------|-------|--------------------|------|-------------------|------|
| NONE           | 0011 | Fat         | 51 | 2.47  | 0.26 | 0.09  | 0.89               | 0.09 | 0.86              | 2.88 |
| NONE           | 0011 | Protein     | 52 | 0.76  | 0.11 | 0.03  | 0.93               | 0.04 | 0.90              | 2.75 |
| NONE           | 0011 | TPC         | 54 | 3.04  | 0.65 | 0.62  | 0.13               | 0.65 | 0.08              | 1.00 |
| NONE           | 0011 | pH          | 54 | 5.57  | 0.37 | 0.17  | 0.79               | 0.21 | 0.69              | 1.76 |
| NONE           | 0011 | TA          | 54 | 17.27 | 4.13 | 2.24  | 0.71               | 2.85 | 0.52              | 1.45 |
| NONE           | 0011 | FI          | 56 | 1.28  | 0.50 | 0.33  | 0.55               | 0.39 | 0.36              | 1.28 |
| NONE           | 0011 | DM          | 55 | 94.50 | 0.59 | 0.19  | 0.89               | 0.20 | 0.88              | 2.95 |
| NONE           | 0011 | Ash         | 54 | 0.16  | 0.03 | 0.01  | 0.83               | 0.01 | 0.77              | 2.07 |

NONE = no correction; SD = standard deviation of reference data selected; SEcal= standard error in calibration; R<sup>2</sup>cal = coefficient of determination of calibration; SEcv = standard error in cross-validation; R<sup>2</sup>cv = coefficient of determination of cross-validation. TPC = total phenolic compound; TA = tirtatable acidity; FI = fermentation index; DM = dry matter.
